# Supplementary material
Source: MDPI journal article supplement (https://www.mdpi.com/1999-4907/12/12/1760)
Supplement: s1 [file s1]

## Supplementary materials

### Comparing the effects of deficiency of N and P on physiology and growth for fast- and slowly-growing provenances of *Fraxinus mandshurica*

Xingtang Zhao, Zhang Liu, Lei Yu, Xintong Ji, Kaixiang Gao, Fansuo Zeng, Yaguang Zhan

**Table S1.** Primers used for qRT-PCR.

| Gene Name      | Description                                | Primer-Forward                     | Primer-Reverse                |
|----------------|--------------------------------------------|------------------------------------|-------------------------------|
| <i>NRT2.1</i>  | High-affinity nitrate transporter          | 5'-CCCGACTGATACCACGGCGAA-3'        | 5'-AGGATTGGCAAAGGAAAAGAGC-3'  |
| <i>NRT2.4</i>  | high affinity nitrate transporter 2.4-like | 5'-GAATGGAACGAGGATGAGAAAGA-3'      | 5'-TGGTTTGGTGTGAATGTGGC-3'    |
| <i>NRT2.5</i>  | high affinity nitrate transporter 2.5      | 5'-CCCTCCTTCCCATCATTCTGT-3'        | 5'-AAGATTTCACCCACCCGCT-3'     |
| <i>NRT2.7</i>  | high affinity nitrate transporter 2.7      | 5'-GTCCACCTCCTTCATTTCATCGC-3'      | 5'-CCCCAACATTAGCCCAACCAG-3'   |
| <i>NIA2</i>    | nitrate reductase [NADH] 2                 | 5'-ACCCAGGCGGGACAGACAGC-3'         | 5'-GTGGACCCCCTTGCGGTAAATC-3'  |
| <i>AAP3</i>    | amino acid transporter                     | 5'-ATTGTCAACCCCTTTTCGCCT-3'        | 5'-GGGATTGGGACTTGGATTCTT-3'   |
| <i>PHT1-3</i>  | inorganic phosphate transporter 1-3        | 5'-<br>GATAGGACACCAAAACCTGGAAC-3'  | 5'-AGCCATAACACCCTTTGGAGTC-3'  |
| <i>PHT1-4</i>  | inorganic phosphate transporter 1-4        | 5'-GGTTGGGTGACAAAATGGGTAG-3'       | 5'-CAAATGTAGTCTGCCTGTGGGG-3'  |
| <i>PHO1;H1</i> | phosphate transporter PHO1 homolog 1       | 5'-<br>TTGATGAAGGACATAAAAGCCACC-3' | 5'-TTCCACTGCCCTCTTCTAATGAC-3' |
| <i>PHO1;H9</i> | phosphate transporter PHO1 homolog 9-like  | 5'-CTTCAGCGGGCTAACGAGTC-3'         | 5'-ATTCCTCTGCCTCCATTTTCAC-3'  |
| <i>PHT2-1</i>  | inorganic phosphate transporter 2-1        | 5'-CGAAGAATCAGAGCCCCCAG-3'         | 5'-CAACAATCCCGAACCCTCCC-3'    |
| <i>TU</i>      | Tubulin                                    | 5'-AGGACGCTGCCAACAACCTTT-3'        | 5'-TTGAGGGGAAGGGTAAATAGTG-3'  |
| <i>AVT1</i>    | vacuolar amino acid transporter 1          | 5'-CCAGAACCAGATAATGGCTACCC-3'      | 5'-TGAAATGGCGTGCGAGTGAT-3'    |

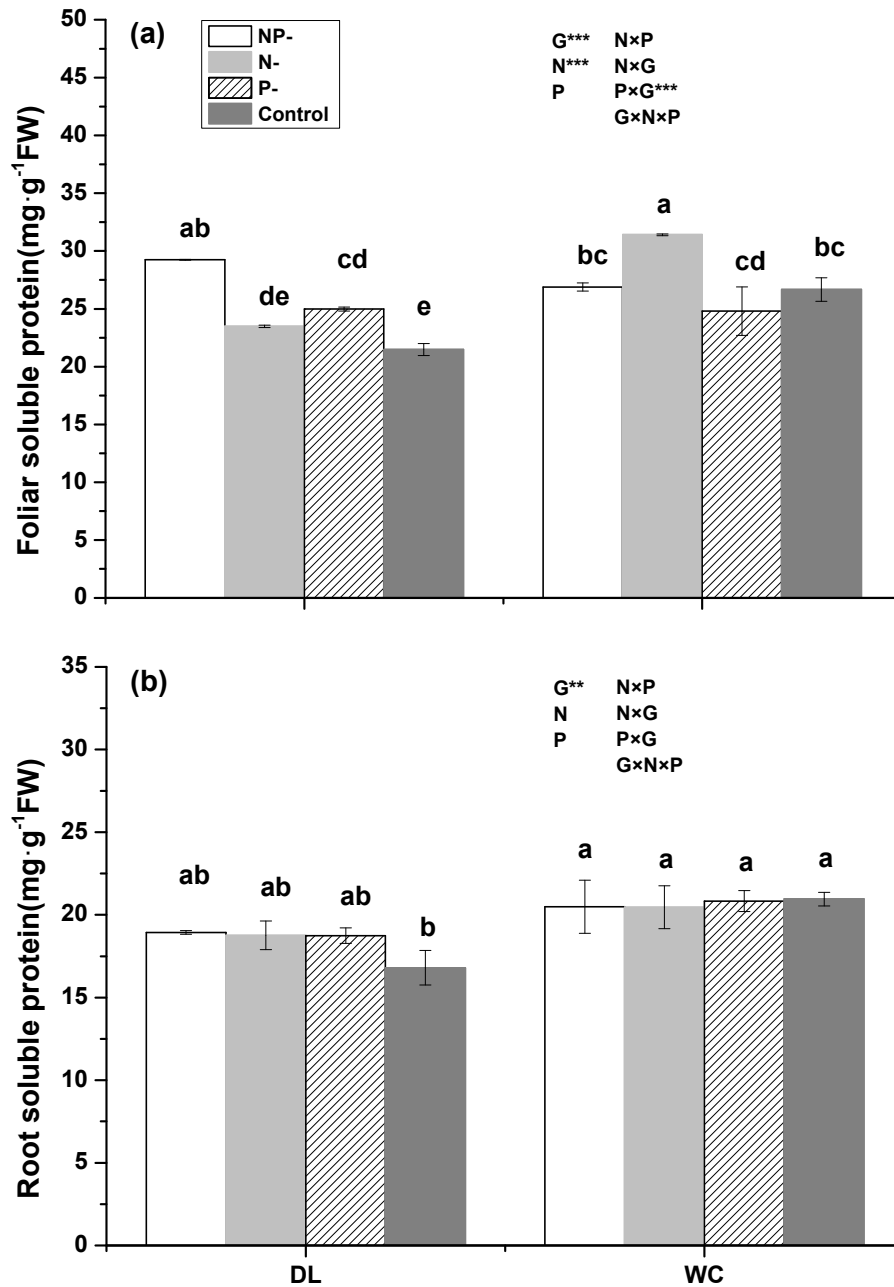

**Figure S1.** Soluble protein content in foliar (a) and roots (b) for Dailing(DL) and Wuchang(WC) provenances of *Fraxinus mandshurica* under complete nutrients and starvation of N, P or both elements. Bars indicate means $\pm$ SE (n=13). Different letters on the bars indicate significant differences. *P*-values obtained from the ANOVAs for Provenances(G), nitrogen(N), Phosphorus(P) and their interactions (N $\times$ P, N $\times$ G, P $\times$ G, N $\times$ P $\times$ G). \**P*<0.05; \*\**P*<0.01; \*\*\**P*<0.001; no \* means insignificant.

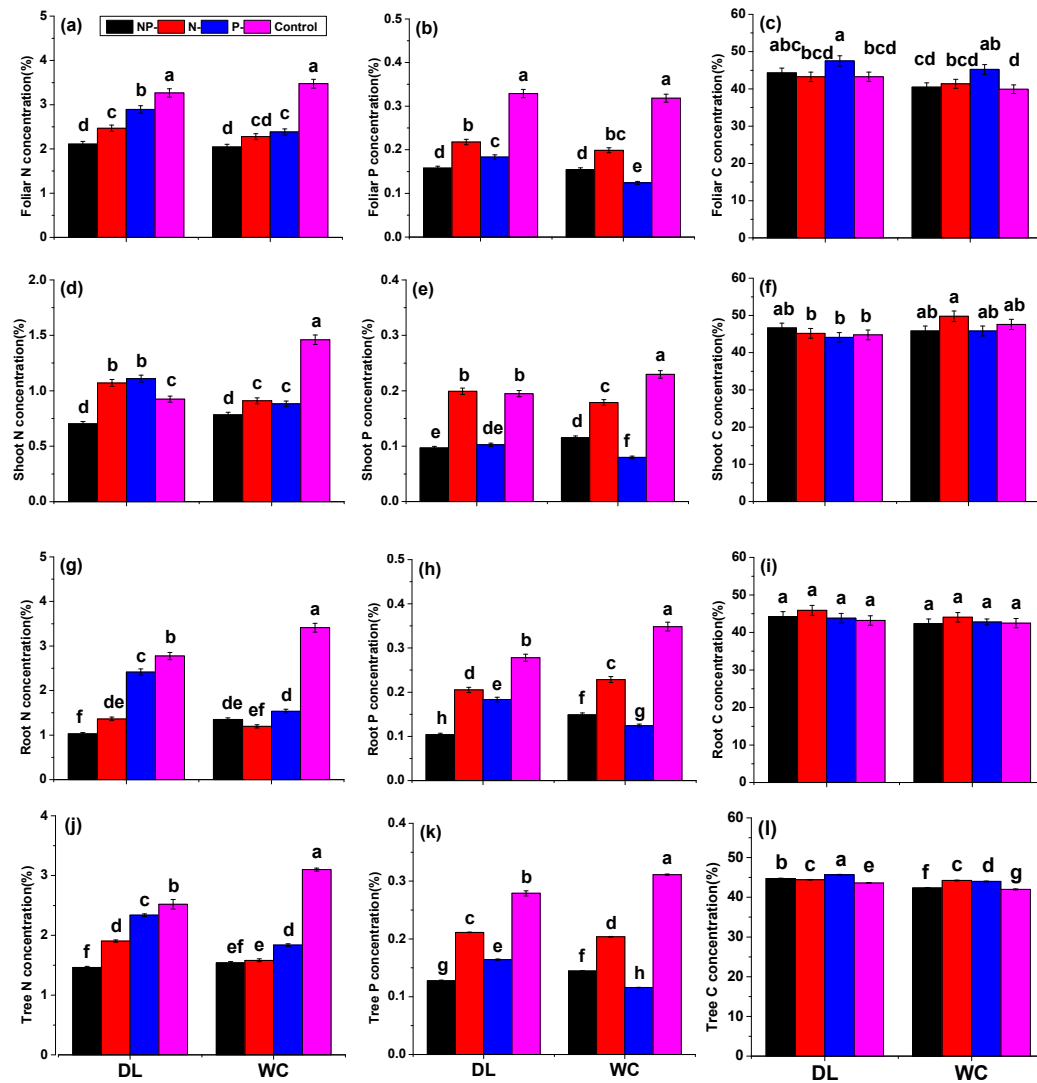

**Figure S2.** The concentration of carbon, nitrogen and phosphorus for root, shoot, foliar and whole tree of seedlings for Dailing (DL) and Wuchang (WC) provenances of *Fraxinus mandshurica* under complete nutrients and starvation of N, P or both elements. Bars indicate means $\pm$ SE (n=13). Different letters on the bars indicate significant differences.

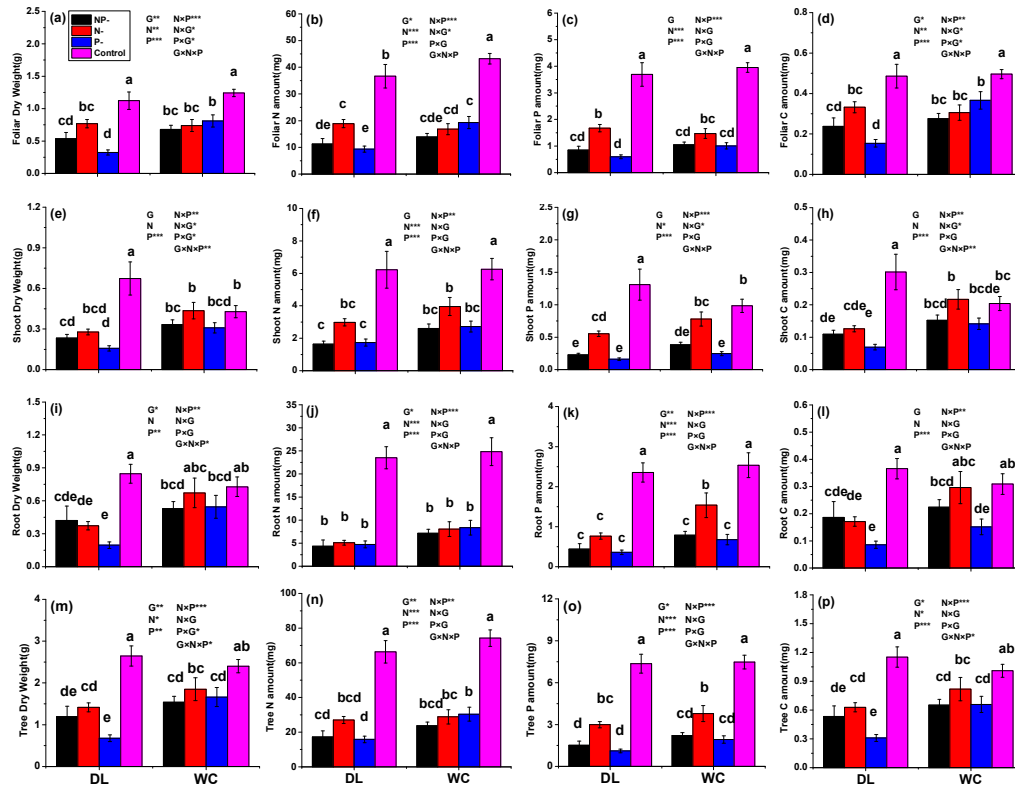

**Figure S3.** Dry weight and amount of carbon, nitrogen and phosphorus for root, shoot, foliar and whole tree of seedlings for Dailing (DL) and Wuchang (WC) provenances of *Fraxinus mandshurica* under complete nutrients and starvation of N, P or both elements. Bars indicate means $\pm$ SE (n=13). Different letters on the bars indicate significant differences. *P*-values obtained from the ANOVAs for Provenances(G), nitrogen(N), Phosphorus(P) and their interactions (N×P, N×G, P×G, N×P×G). \**P*<0.05; \*\**P*<0.01; \*\*\**P*<0.001; no \* means insignificant.

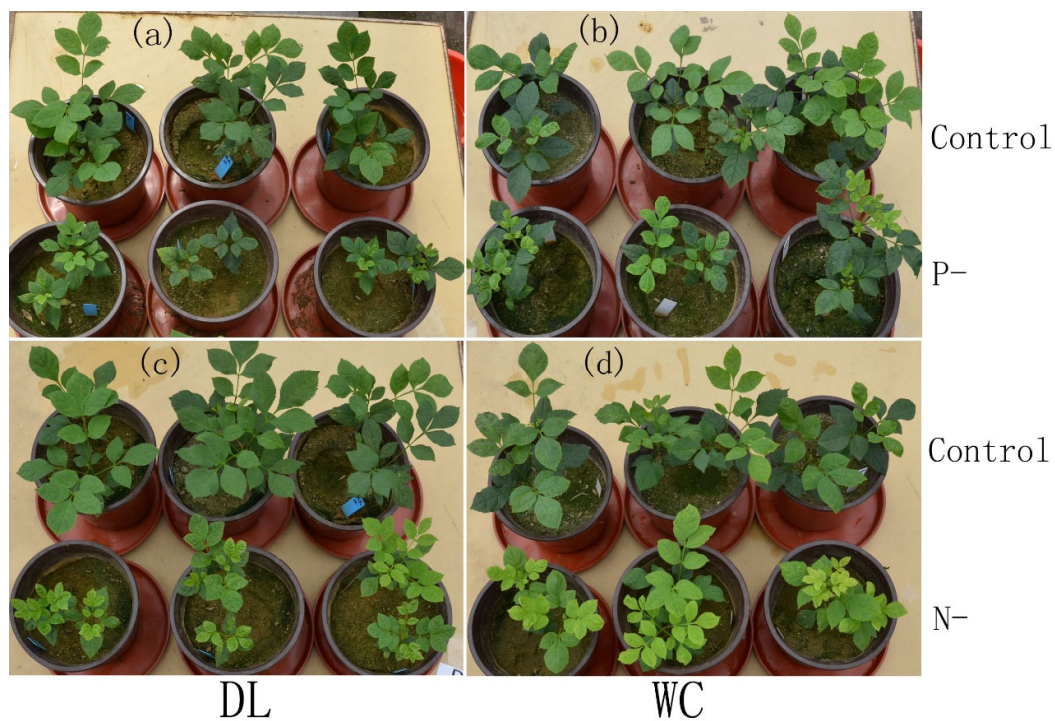

**Figure S4.** Variation in leaf size and color of seedlings for Dailing (DL) and Wuchang (WC) provenances of *Fraxinus mandshurica* under complete nutrients and starvation of N or P.

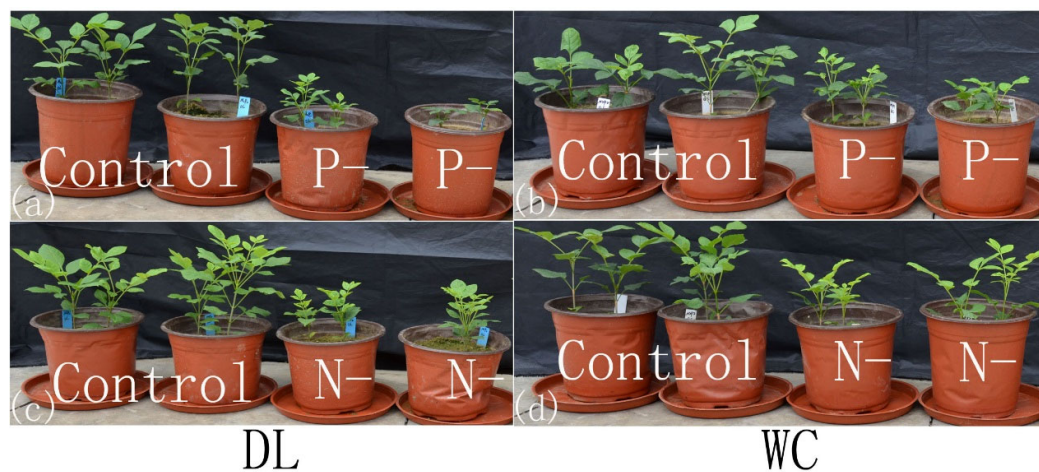

**Figure S5.** Variation in height of seedlings for Dailing (DL) and Wuchang (WC) provenances of *Fraxinus mandshurica* under complete nutrients and starvation of N or P.



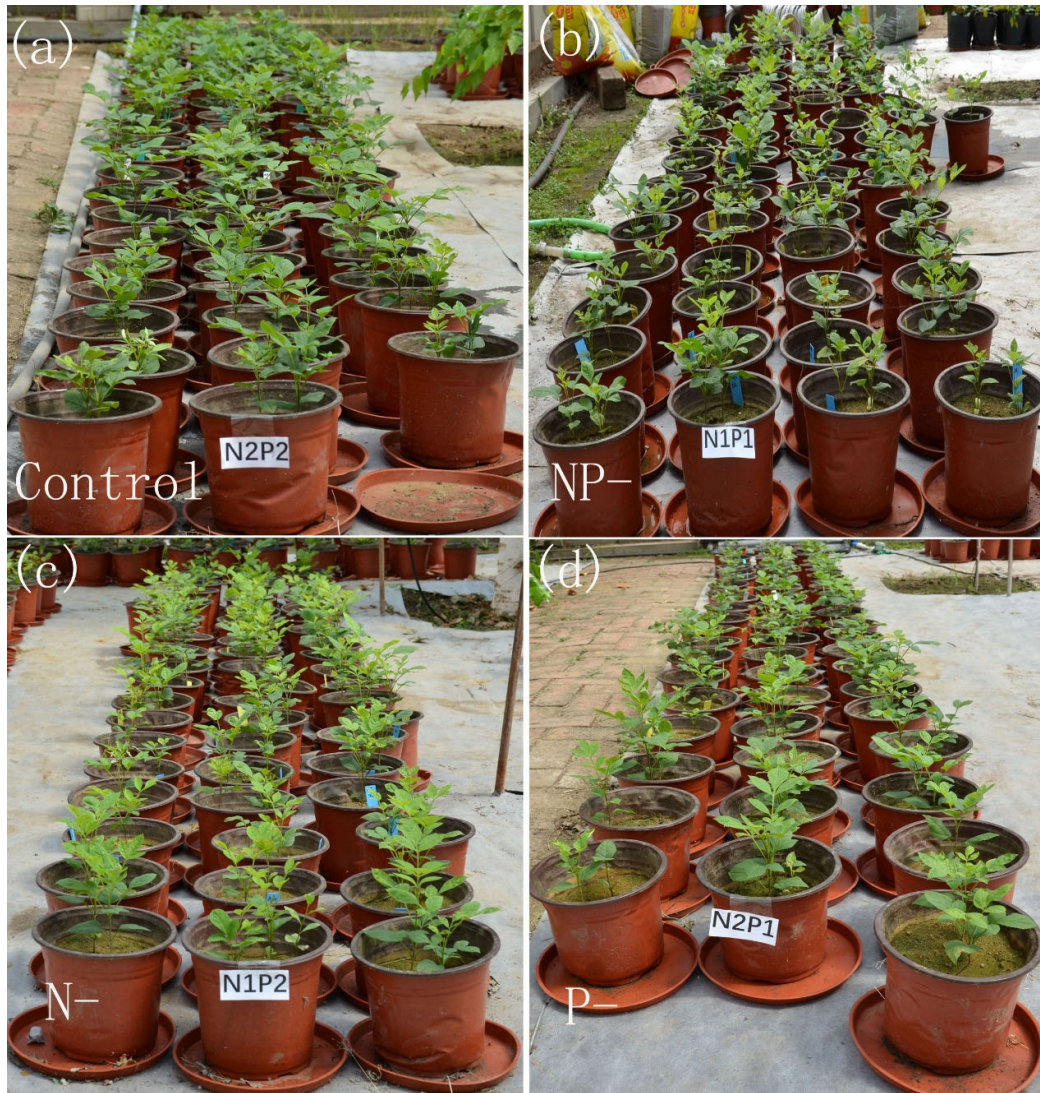

**Figure S6.** Seedlings for Dailing(DL) and Wuchang(WC) provenances of *Fraxinus mandshurica* under complete nutrients and starvation of N, P or both elements.
